# Supplementary material for: Improved biorefinery pathways of marine diatoms using a water miscible ionic liquid and its colloidal solution: efficient lipid extraction and in situ synthesis of fluorescent carbon dots for bio-imaging applications
Source: Royal Society of Chemistry journal article supplement (doi:10.1039/d1ra01425k), 2021-01-01
Supplement: d1ra01425k1.pdf [file d1ra01425k1.pdf]

**Electronic supplementary information (ESI) for**

**Improved biorefinery pathways of marine diatoms using a water miscible ionic liquid and its colloidal solution: Efficient lipid extraction and in-situ synthesis of fluorescent carbon dots for bio-imaging applications**

*Paidi Murali Krishna,<sup>a,b</sup> Veerababu Polisetti,<sup>b</sup> Krishnaiah Damarla,<sup>a,b\*</sup> Subir Kumar Mandal,<sup>a,b\*</sup> and Arvind Kumar<sup>a,b\*</sup>*

<sup>a</sup>Academy of Scientific and Innovative Research (AcSIR), Ghaziabad-201002, India

<sup>b</sup>CSIR-Central Salt and Marine Chemicals Research Institute, G. B. Marg,

Bhavnagar-364002, Gujarat, India.

**Corresponding authors addresses:** Email: Krishnaiah Damarla, [damarlakittu@gmail.com](mailto:damarlakittu@gmail.com); Subir Kumar Mandal, [skmandal@csmcri.res.in](mailto:skmandal@csmcri.res.in); and Arvind Kumar [arvind@csmcri.res.in](mailto:arvind@csmcri.res.in)

Number of pages: 10

Number of figures: 11

Number of tables: 01

## Table of contents

| Titles of the figures / tables.                                                                                                                                                                                                                                      | Page No. |
|----------------------------------------------------------------------------------------------------------------------------------------------------------------------------------------------------------------------------------------------------------------------|----------|
| <b>Fig. S1</b> <sup>1</sup> H NMR spectra of pure [EMIM][Ac].                                                                                                                                                                                                        | S3       |
| <b>Fig. S2</b> <sup>13</sup> C NMR spectra of pure [EMIM][Ac].                                                                                                                                                                                                       | S3       |
| <b>Fig. S3</b> <sup>1</sup> H NMR spectra of pure [Cho][AOT].                                                                                                                                                                                                        | S4       |
| <b>Fig. S4</b> <sup>13</sup> C NMR spectra of pure [Cho][AOT].                                                                                                                                                                                                       | S4       |
| <b>Fig. S5</b> Growth of the diatom <i>T. Lundiana</i> CSIRCSMCRI 001 at 25±1°C in f/2 media. (A). Logarithmic growth curve, (B). Specific growth rate (μ day <sup>-1</sup> ). Data shown in mean ± SE, n=3.                                                         | S5       |
| <b>Table S1</b> Lipid separated from ionic liquid pre-treated biomass of <i>Thalassiosira lundiana</i> CSIRCSMCRI 001. .                                                                                                                                             | S6       |
| <b>Fig. S6</b> Thermal gravimetric analysis (TGA) of pure ionic liquid [EMIM][Ac] and recovered ILs after lipid extraction from <i>T. lundiana</i> CSIRCSMCRI 001.                                                                                                   | S7       |
| <b>Fig. S7</b> DSC analysis of pure ionic liquid (EMIMAc) and recovered ILs after lipid fractionation extraction.                                                                                                                                                    | S7       |
| <b>Fig. S8</b> Fourier transform infrared spectroscopy annotation of pure ionic liquid [EMIM][Ac] and recovered ILs after the lipid extraction.                                                                                                                      | S8       |
| <b>Fig. S9</b> Fourier transform infrared spectroscopy annotation of pure colloidal solution ([EMIM][Ac]+ AOT) and CDs loaded fluorescent colloidal solution.                                                                                                        | S8       |
| <b>Fig. S10</b> FT-NMR spectral confirmation of compositional changes in synthetic colloidal solution during fluorescent carbon dots synthesise. (A) Pure synthetic colloidal solution ([EMIM][Ac]+AOT), (B) Fluorescent carbon dots synthesised colloidal solution. | S9       |
| <b>Fig. S11</b> Fluoresce emission spectra at different excitation energy (400nm to 650nm, are provided) of CDs loaded colloidal solution.                                                                                                                           | S10      |

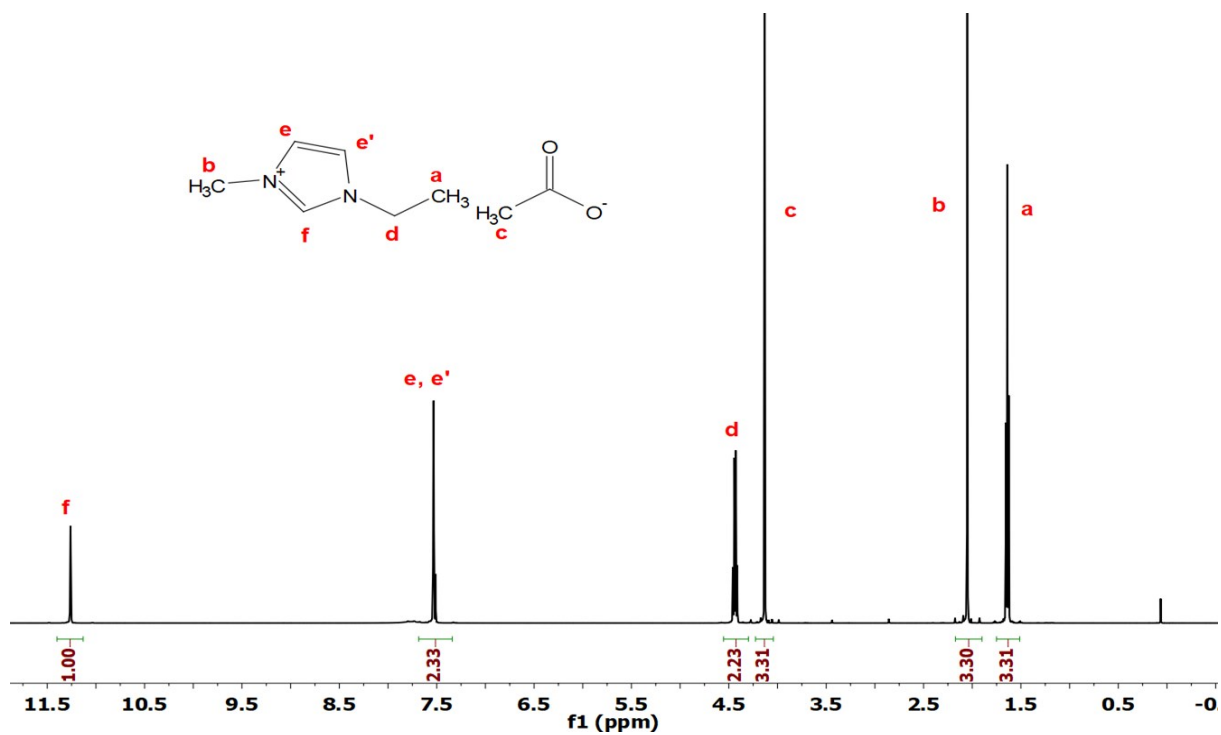

Fig. S1 <sup>1</sup>H NMR spectra of pure [EMIM][Ac].

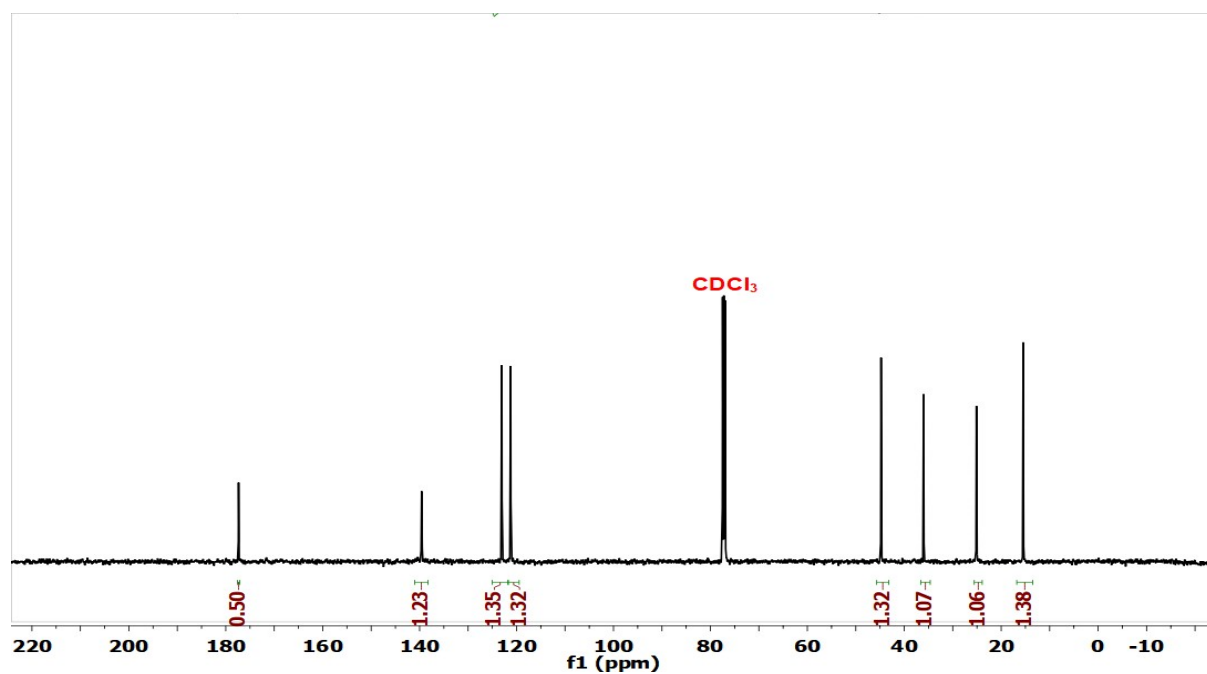

Fig. S2 <sup>13</sup>C NMR spectra of pure [EMIM][Ac].

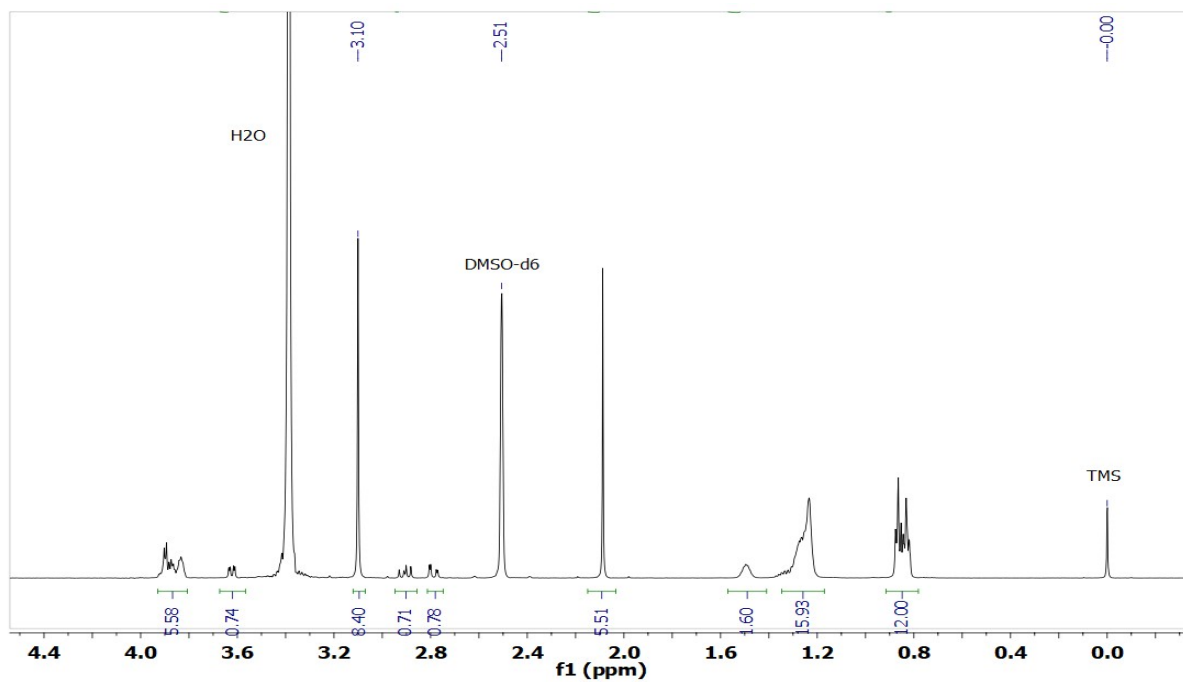

Fig. S3  $^1\text{H}$  NMR spectra of pure [Cho][AOT].

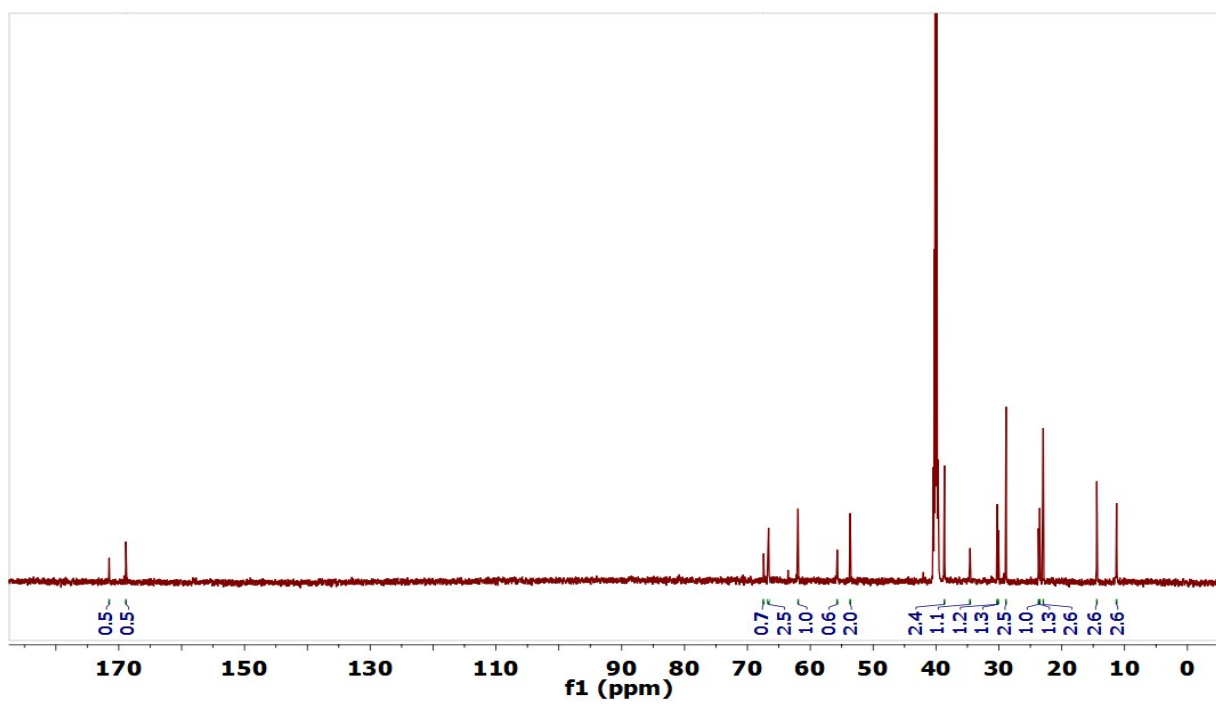

Fig. S4  $^{13}\text{C}$  NMR spectra of pure [Cho][AOT].

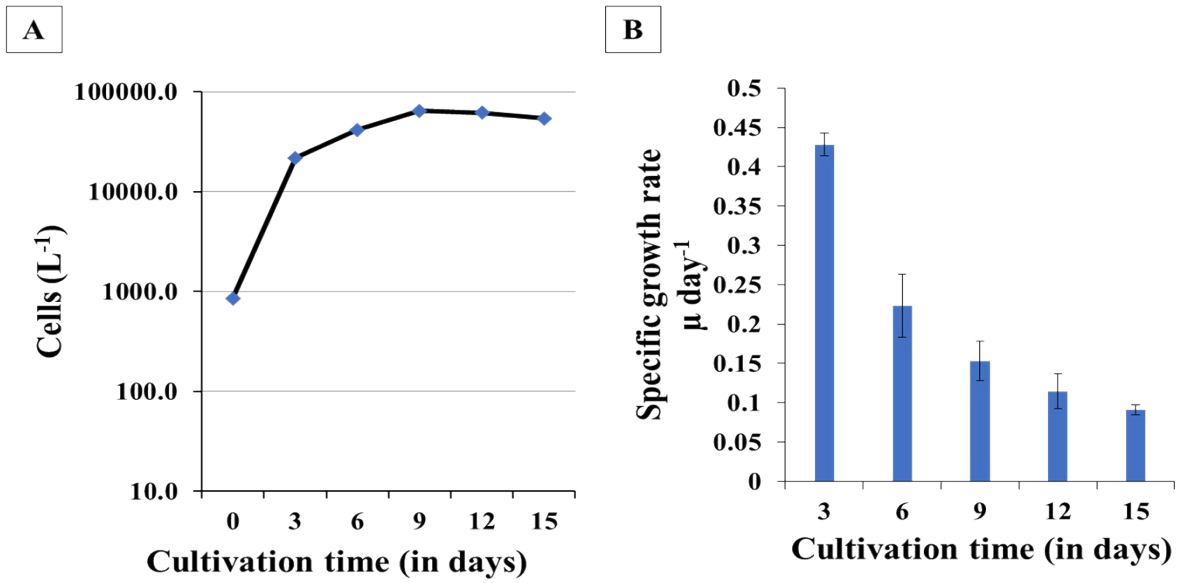

**Fig. S5** Growth of the diatom *T. Lundiana* CSIRCSMCRI 001 at  $25\pm 1^\circ\text{C}$  in f/2 media. (A). Logarithmic growth curve, (B). Specific growth rate ( $\mu \text{ day}^{-1}$ ). Data shown in mean  $\pm$  SE, n=3.

**Table S1.** Lipid separated from ionic liquid pre-treated biomass of *Thalassiosira lundiana* CSIRCSMCRI 001.

| S.No.                               | Fatty acid composition |                                      | % of FAs in total lipid |
|-------------------------------------|------------------------|--------------------------------------|-------------------------|
| 1                                   | C8:0                   | Octanoic acid, TMS                   | 0.17                    |
| 2                                   | C8:1                   | 3-Octenoic acid, TMS                 | 2.40                    |
| 3                                   | C10:0                  | Decanoic acid, TMS                   | 1.46                    |
| 4                                   | C12:0                  | Dodecanoic acid, 4,6-dimethyl-       | 1.87                    |
| 5                                   | C12:1                  | 5-Dodecenoic acid, TMS derivative    | 1.20                    |
| 6                                   | C14:0                  | Myristic acid, TMS derivative        | 21.40                   |
| 7                                   | C14:1                  | 9-Tetradecenoic acid, TMS derivative | 0.22                    |
| 8                                   | C16:0                  | Palmitic Acid, TMS derivative        | 11.63                   |
| 9                                   | C16:1, n-7             | Palmitelaidic acid, TMS derivative   | 8.84                    |
| 10                                  | C18:0                  | Stearic acid, TMS derivative         | 6.28                    |
| 11                                  | C18:1, n-9             | Oleic Acid, TMS derivative           | 1.65                    |
| 12                                  | C18:2, n-6             | Linoleic acid, 3TMS derivative       | 3.98                    |
| 13                                  | C19:0                  | Nonadecanoic acid TMS derivative     | 0.22                    |
| 14                                  | C19:3                  | Z,Z,Z-4,6,9-Nonadecatriene           | 0.20                    |
| 15                                  | C20:4, n-6             | Arachidonic acid, TMS derivative     | 10.48                   |
| 16                                  | C20:0                  | Arachidic acid, TMS derivative       | 4.25                    |
| 17                                  | C22:6, n-3             | Docosahexaenoic acid, TMS derivative | 19.74                   |
| 18                                  | C26:0                  | Hexacosanoic acid, TMS derivative    | 0.57                    |
| 19                                  | C27:2                  | Desmosterol, TMS derivative          | 2.30                    |
| 20                                  | C28:0                  | Octacosanoic acid, TMS derivative    | 0.85                    |
| 21                                  | C30:0                  | Triacotanoic acid, TMS derivative    | 0.29                    |
| Total                               |                        |                                      | 100 %                   |
| Total fatty acids (mg/g dry weight) |                        |                                      | 90.56                   |
| % of total lipids                   |                        |                                      | 9.06                    |

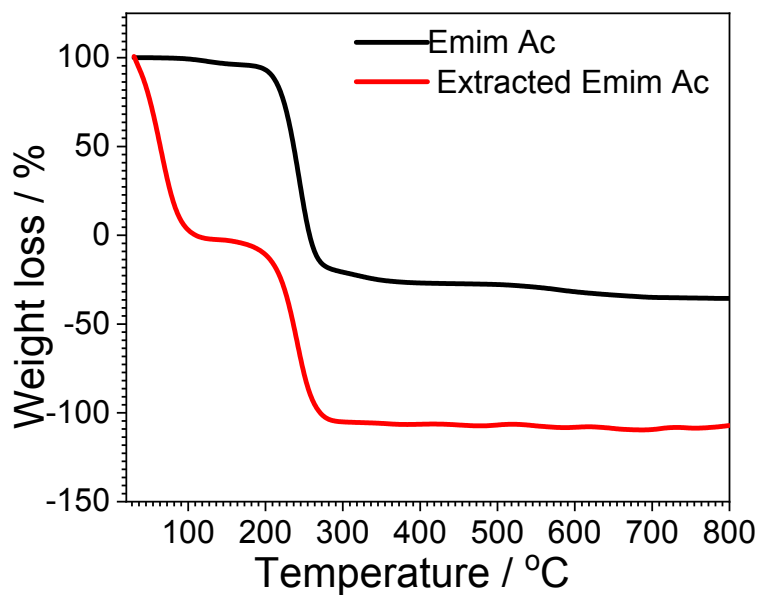

**Fig. S6** Thermal gravimetric analysis (TGA) of pure ionic liquid [EMIM][Ac] and RIBC solutions after lipid extraction from *T. lundiana* CSIRCSMCRI 001.

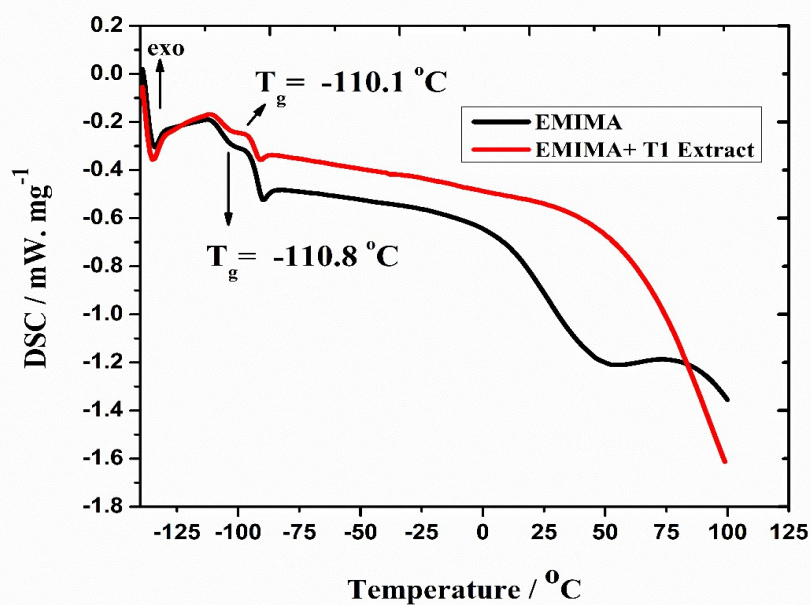

**Fig. S7** DSC analysis of pure ionic liquid (EMIMAc) and RIBC solutions after lipid fractionation extraction.

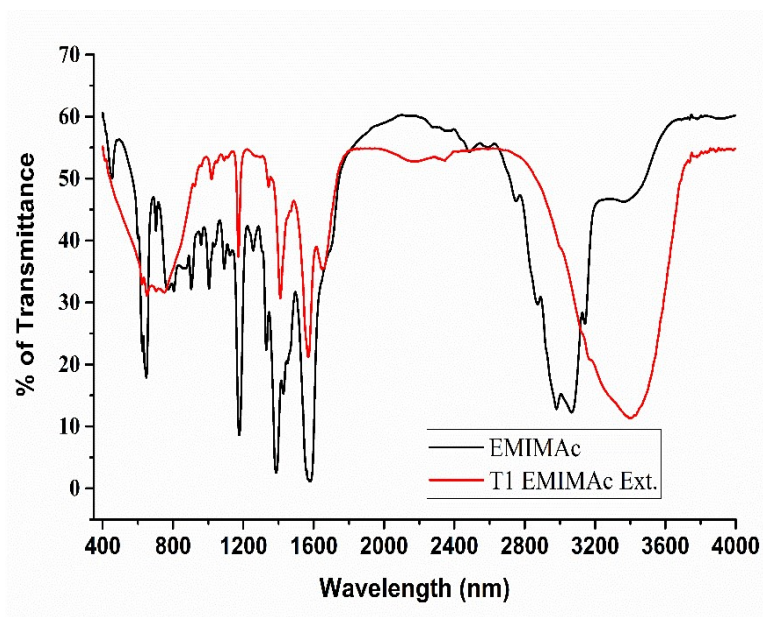

**Fig. S8** Fourier transform infrared spectroscopy annotation of pure ionic liquid [EMIM][Ac] and RIBC solutions after the lipid extraction.

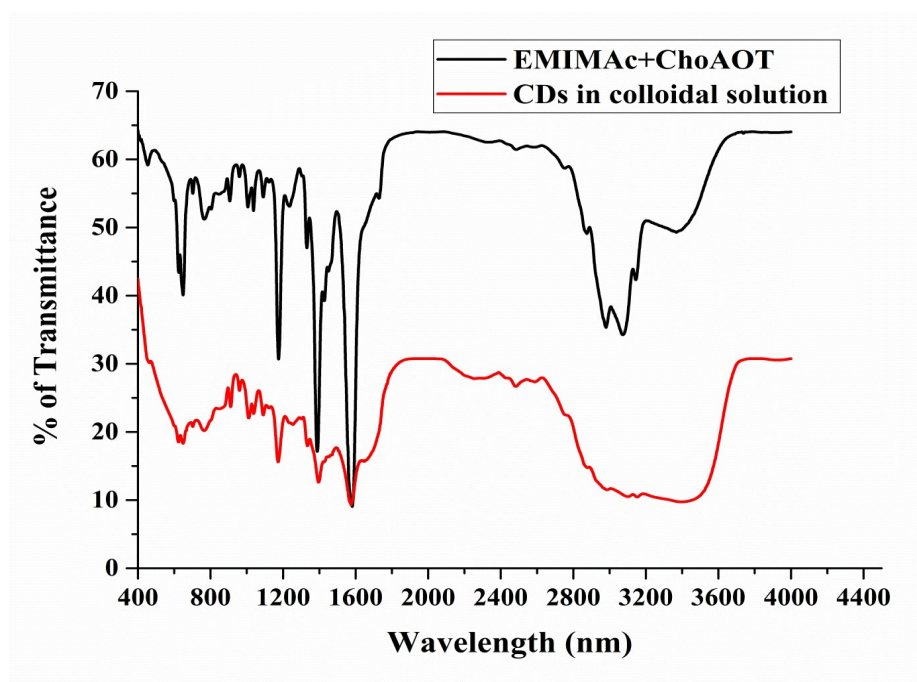

**Fig. S9** Fourier transform infrared spectroscopy annotation of pure colloidal solution ([EMIM][Ac]+ AOT) and CDs loaded fluorescent colloidal solution.



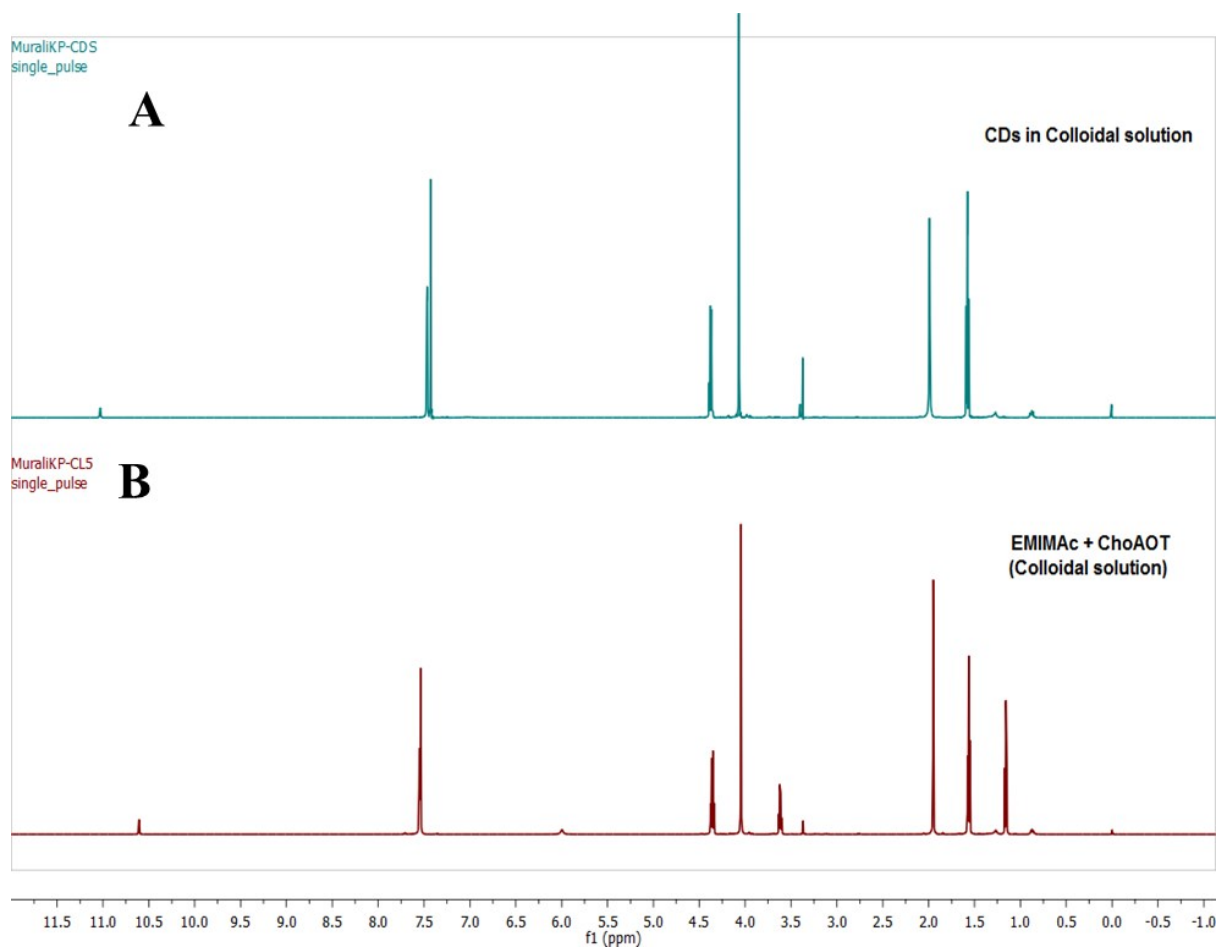

**Fig. S10** FT-NMR spectral confirmation of compositional changes in synthetic colloidal solution during fluorescent carbon dots synthesise. (A) Pure synthetic colloidal solution ([EMIM][Ac]+AOT), (B) Fluorescent carbon dots synthesised colloidal solution.

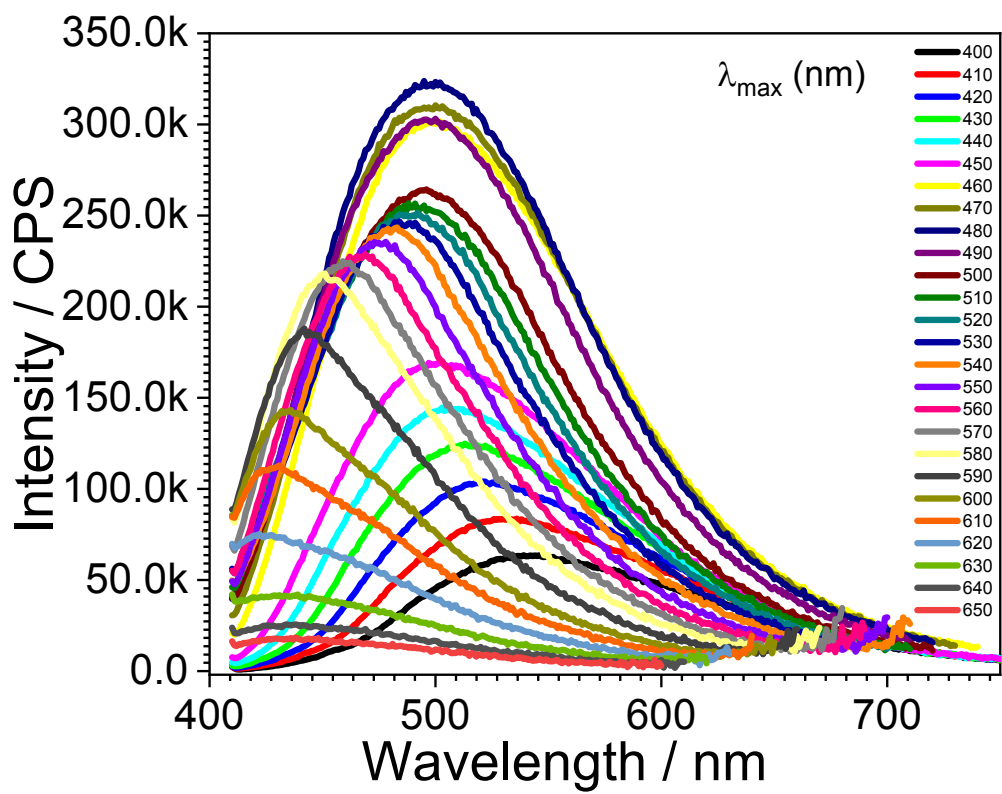

**Fig. S11** Fluoresce emission spectra at different excitation energy (400nm to 650nm, are provided) of CDs loaded colloidal solution.
